# Supplementary material for: Mechanism for the formation and growth of carbonaceous spheres from sucrose by hydrothermal carbonization
Source: Royal Society of Chemistry journal article supplement (doi:10.1039/c5ra26725k), 2016-01-01
Supplement: c5ra26725k1.pdf [file c5ra26725k1.pdf]

# Mechanism for formation and growth of carbonaceous spheres from sucrose by hydrothermal carbonization

Yujie Qi,<sup>a</sup> Mu Zhang<sup>b</sup>, Lin Qi<sup>a</sup> and Yang Qi<sup>a\*</sup>

<sup>a</sup> Institute of Materials Physics and Chemistry, Northeastern University, Shenyang 110819, China.

<sup>b</sup> Key Laboratory for Anisotropy and Texture of Materials (MOE), Northeastern University, Shenyang 110819, China.

## Supporting Information

**Table S1.** Synthesis conditions and statistic results for carbonaceous spheres obtained at 0.333 M in SH and RH routes

| Sample | Synthesis conditions |                     |            | 100% Range           |               | 90% Range            |               | 50% Range            |               | Standard deviation ( nm ) |
|--------|----------------------|---------------------|------------|----------------------|---------------|----------------------|---------------|----------------------|---------------|---------------------------|
|        | Heating route        | Concentration ( M ) | Time ( h ) | Mean diameter ( nm ) | Range ( nm )  | Mean diameter ( nm ) | Range ( nm )  | Mean diameter ( nm ) | Range ( nm )  |                           |
|        |                      |                     |            |                      |               |                      |               |                      |               |                           |
| A-1    | SH                   | 0.333               | 2.5        | 201.84               | 89.54~410.28  | 201.20               | 124.00~279.23 | 202.03               | 163.11~237.52 | 48.62                     |
| A-2    | SH                   | 0.333               | 2.75       | 316.15               | 163.64~597.96 | 315.95               | 199.97~416.16 | 318.05               | 266.12~372.13 | 70.91                     |
| A-3    | SH                   | 0.333               | 3          | 373.96               | 215.74~480.36 | 374.46               | 287.14~443.39 | 375.20               | 341.50~415.88 | 49.05                     |
| A-4    | SH                   | 0.333               | 3.5        | 473.56               | 266.88~656.03 | 473.35               | 328.18~623.31 | 466.43               | 407.41~544.45 | 90.00                     |
| A-5    | RH                   | 0.333               | 2.5        | 206.60               | 70.68~347.27  | 207.16               | 124.21~272.14 | 210.87               | 169.74~241.82 | 47.74                     |
| A-6    | RH                   | 0.333               | 2.75       | 296.88               | 109.12~398.52 | 300.17               | 192.63~357.82 | 308.33               | 268.85~332.03 | 50.51                     |
| A-7    | RH                   | 0.333               | 3          | 383.20               | 147.07~593.60 | 386.36               | 279.28~442.42 | 392.19               | 370.74~411.93 | 47.40                     |
| A-8    | RH                   | 0.333               | 3.5        | 574.32               | 255.49~854.05 | 576.34               | 395.04~733.70 | 578.71               | 506.73~646.42 | 102.71                    |

(Define abbreviations: SH is denoted as Slow Heating, RH for Rapid Heating.)

**Table S2.** Synthesis conditions and statistic results for carbonaceous spheres obtained from different hydrothermal treatments of sucrose

| Sample | Synthesis conditions |                     |            | 100% Range           |               | 90% Range            |               | 50% Range            |               | Standard deviation ( nm ) |
|--------|----------------------|---------------------|------------|----------------------|---------------|----------------------|---------------|----------------------|---------------|---------------------------|
|        | Heating route        | Concentration ( M ) | Time ( h ) | Mean diameter ( nm ) | Range ( nm )  | Mean diameter ( nm ) | Range ( nm )  | Mean diameter ( nm ) | Range ( nm )  |                           |
|        |                      |                     |            |                      |               |                      |               |                      |               |                           |
| B-1    | SH                   | 0.100               | 4          | 229.93               | 123.35~383.96 | 229.35               | 177.62~286.82 | 229.39               | 210.79~246.72 | 33.00                     |
| B-2    | SH                   | 0.167               | 4          | 311.85               | 170.03~560.88 | 308.84               | 223.94~407.43 | 305.94               | 273.64~343.37 | 57.08                     |

|      |    |       |      |        |                |        |                |        |               |        |
|------|----|-------|------|--------|----------------|--------|----------------|--------|---------------|--------|
| B-3  | SH | 0.233 | 4    | 456.83 | 155.7~756.33   | 459.22 | 304.1~594.07   | 462.09 | 407.98~511.89 | 85.61  |
| B-4  | SH | 0.300 | 4    | 554.24 | 195.76~823.31  | 557.13 | 363.39~692.11  | 566.02 | 493.12~626.70 | 100.64 |
| B-5  | SH | 0.333 | 4    | 672.97 | 273.74~1070.52 | 674.80 | 438.71~882.45  | 680.68 | 571.68~775.00 | 134.74 |
| B-6  | RH | 0.067 | 4    | 136.03 | 51.14~272.95   | 135.29 | 101.84~179.03  | 134.30 | 121.13~148.52 | 23.65  |
| B-7  | RH | 0.100 | 4    | 192.81 | 74.61~400.05   | 190.59 | 145.48~259.40  | 186.49 | 169.86~210.33 | 38.70  |
| B-8  | RH | 0.167 | 4    | 304.63 | 102.45~889.46  | 302.79 | 199.54~406.01  | 303.16 | 265.19~338.62 | 68.33  |
| B-9  | RH | 0.233 | 4    | 614.98 | 201.74~902.86  | 618.85 | 432.88~768.70  | 621.09 | 558.76~680.97 | 102.46 |
| B-10 | RH | 0.300 | 4    | 683.84 | 230.64~1054.78 | 687.15 | 478.68~852.57  | 691.84 | 617.86~758.49 | 110.53 |
| B-11 | RH | 0.333 | 4    | 827.12 | 322.54~1788.68 | 823.99 | 505.53~1088.79 | 839.08 | 678.80~974.77 | 191.57 |
| B-12 | RH | 0.100 | 3    | 162.22 | 47.49~408.66   | 159.16 | 96.42~244.06   | 156.14 | 125.35~190.25 | 50.32  |
| B-13 | RH | 0.100 | 3.5  | 189.78 | 93.3~475.86    | 188.22 | 140.42~249.86  | 185.66 | 166.88~209.85 | 35.38  |
| B-14 | RH | 0.100 | 3.75 | 138.43 | 75.11~251.97   | 137.57 | 104.82~182.05  | 136.77 | 123.59~149.71 | 22.82  |

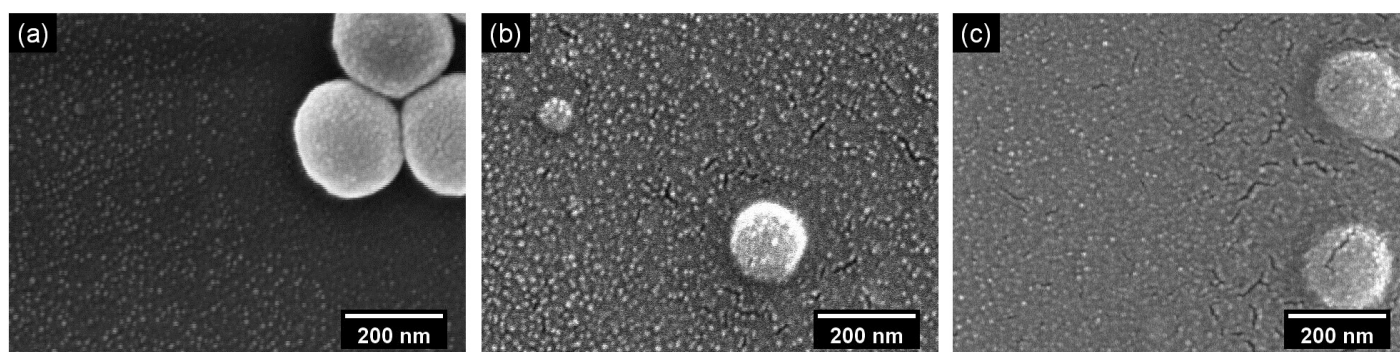

|      |    |       |      |        |               |        |               |        |               |       |
|------|----|-------|------|--------|---------------|--------|---------------|--------|---------------|-------|
| B-15 | RH | 0.100 | 4.5  | 192.38 | 89.07~329.50  | 191.51 | 142.56~250.70 | 191.29 | 173.05~209.27 | 31.58 |
| B-16 | RH | 0.100 | 5    | 208.28 | 81.34~378.08  | 207.01 | 154.13~277.26 | 203.48 | 183.09~228.32 | 37.99 |
| B-17 | RH | 0.100 | 5.5  | 288.08 | 139.47~499.13 | 287.41 | 211.60~366.45 | 287.99 | 260.08~314.43 | 46.09 |
| B-18 | RH | 0.067 | 3    | 112.44 | 37.79~218.58  | 110.04 | 67.64~168.18  | 110.08 | 92.90~125.38  | 30.59 |
| B-19 | RH | 0.067 | 3.5  | 151.82 | 68.53~251.55  | 151.28 | 108.51~200.24 | 150.79 | 134.92~166.72 | 27.73 |
| B-20 | RH | 0.067 | 3.75 | 137.05 | 63.39~205.97  | 136.34 | 106.15~179.12 | 134.66 | 121.30~149.60 | 21.84 |
| B-21 | RH | 0.067 | 4.5  | 125.64 | 71.66~214.79  | 125.31 | 95.91~155.72  | 125.45 | 112.57~137.20 | 18.71 |
| B-22 | RH | 0.067 | 5    | 123.85 | 62.26~286.22  | 123.27 | 92.07~156.84  | 123.42 | 110.43~135.90 | 20.86 |
| B-23 | RH | 0.067 | 5.5  | 162.96 | 97.97~488.02  | 159.08 | 126.00~217.72 | 155.71 | 141.53~173.98 | 38.47 |

(Define abbreviations: SH is denoted as Slow Heating, RH for Rapid Heating.)

**Fig. S1.** FESEM images of primary particles deposited on substrates from (a) 0.100 M solution reacted for 3.5, h, 0.067 M solutions reacted for (b) 3 h and (c) 3.5 h in RH route respectively.

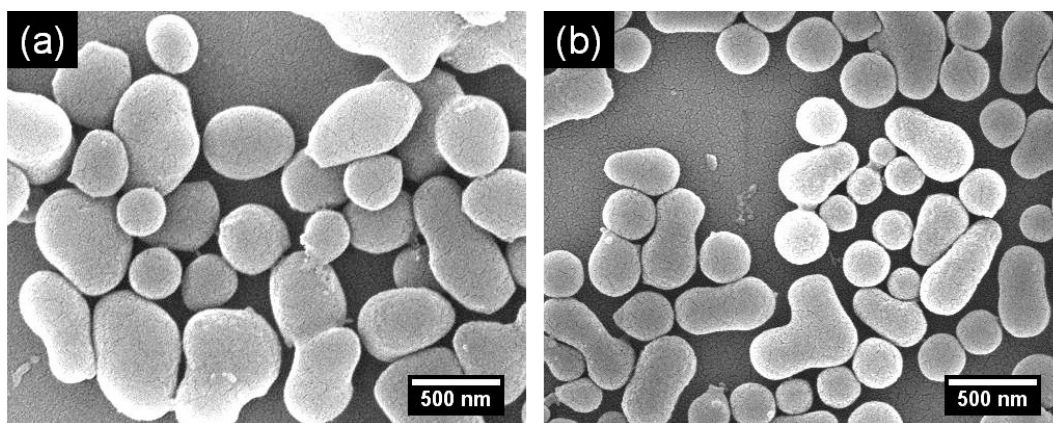

**Fig. S2.** FESEM images of carbonaceous spheres reacted at (a) 0.050 M for 6 h, (b) 0.033 M for 10 h in RH route.
